# Supplementary material for: CRYβB2 is a biomarker for poor prognosis and response to CDK4/6 inhibitors in breast cancer
Source: Research Square preprint supplement (doi:10.21203/rs.3.rs-6431382/v1), 2025-05-07
Supplement: Supplementary file 1 [file c8844544c07b6080b58f2311.docx]

Supplementary Information

**CRYβB2 is a biomarker for poor prognosis and response to CDK4/6 inhibitors in breast cancer**

Yu Yan et al.

**Supplementary Material**

**Antibody list**. Antibodies and conditions used for Western Blot (WB), Immunohistochemistry (IHC) and Immunofluorescence (IF).

| Name | Company | Catalog No. |  | Dilution |  |
| --- | --- | --- | --- | --- | --- |
|  |  |  | WB | IHC | IF |
| CRYβB2 | Thermo Fisher | PA5-60496 | 1:800 | 1:200 | 1:50 |
|  | Santa Cruz | sc-376006 | 1:1000 |  | 1:50 |
|  | Novus | NBP2-13876 | 1:1000 | 1:100 | 1:50 |
| Beta-actin | Sigma | A2228 | 1:3000 |  |  |
| CDK4 | Cell Signaling | 12790T | 1:1000 | 1:400 |  |
| Cdc25a | Cell Signaling | 3652S | 1:1000 |  |  |
| ppRb | Cell Signaling | 8516T | 1:1000 | 1:200 |  |
| Rb | Cell Signaling | 9309 | 1:2000 |  |  |
| Nucleolin | Cell Signaling | #14574 | 1:1000 | 1:400 | 1:1000 |
| DYKDDDDK_tag | Cell Signaling | #14793 |  |  | 1:800 |
| Myc_Tag | Cell Signaling | #2278 |  |  | 1:200 |
| p53 (DO-1) | Santa Cruz | SC-126 | 1:2000 |  |  |
| GAPDH | Cell Signaling | #97166 | 1:2000 |  |  |
| Rabbit IgG | GE lifesciences | NA934V | 1:3000 |  |  |
| Mouse IgG | GE lifesciences | NA931 | 1:3000 |  |  |
| Rabbit IgG A647 | Thermo Fisher | A-21247 |  |  | 1:2000 |
| Mouse IgG A488 | Thermo Fisher | A-11001 |  |  | 1:2000 |
| Hoechst | Thermo Fisher | H3570 |  |  | 1:1000 |

**
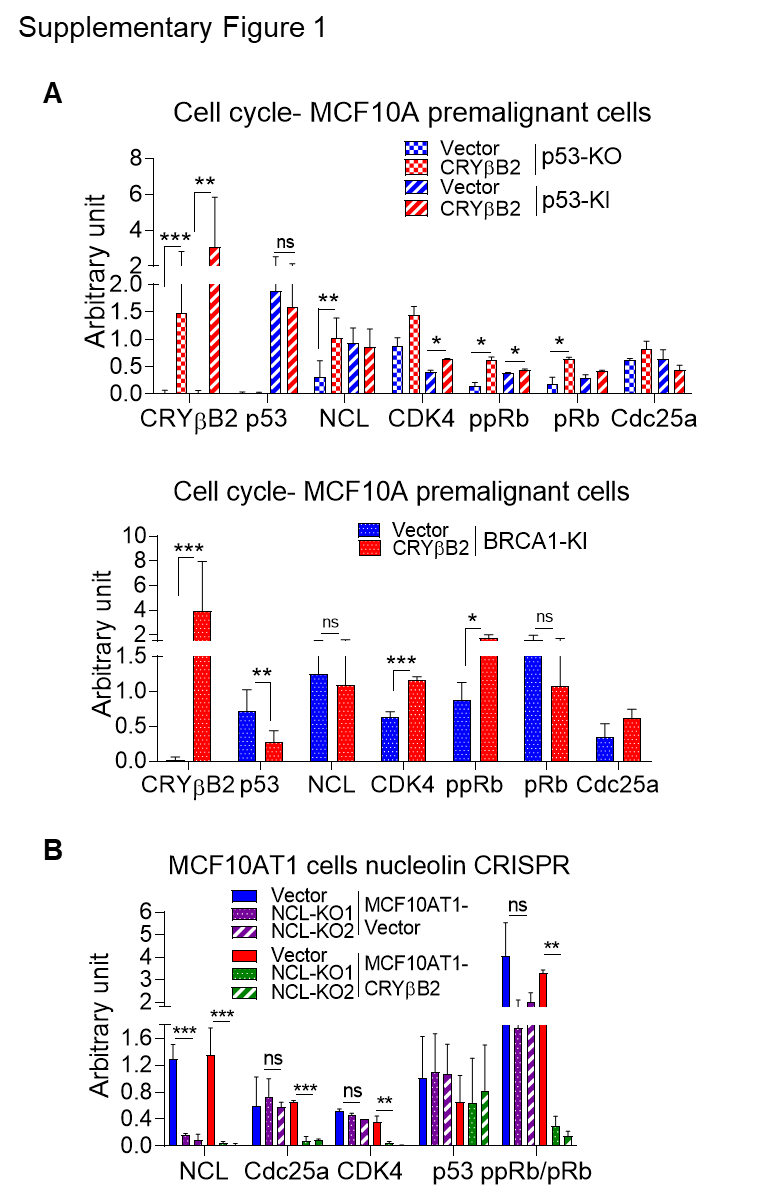
**

**
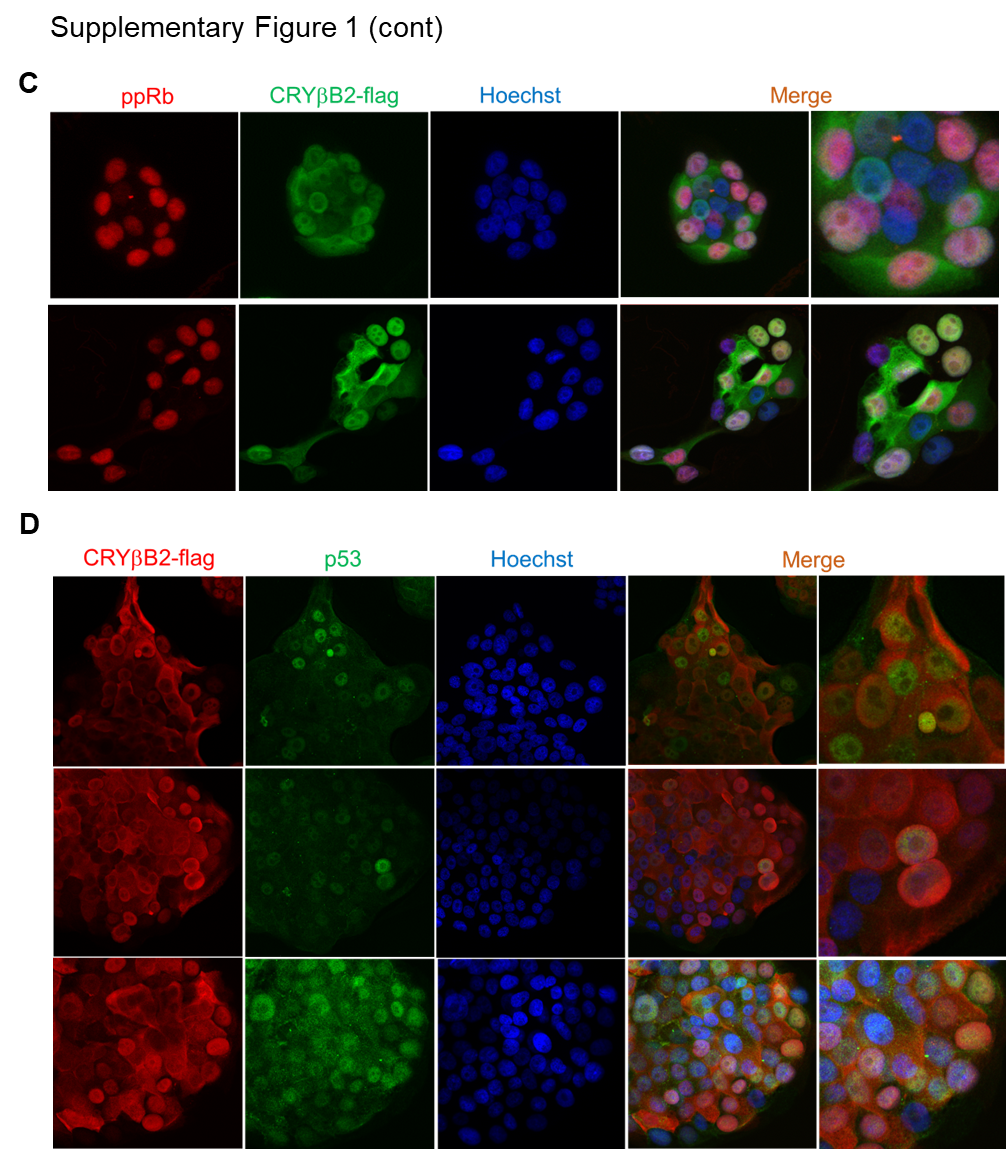
**

**Supplementary Fig. 1. CRYβB2 activates CDK4/ pRb pathway in premalignant tumors and DCIS**. Image J quantification of CRYβB2 and cell cycle proteins in premalignant MCF10A-p53 null (KO), p53-R248W knockin (KI) cells, and MCF10A-BRCA1-185delAG KI cells (**A**) and MCF10AT1- CRYβB2 and vector, containing NCL wild-type or knockout (NCL-KO#1 and #2) (**B**). Immunofluorescence staining of MCF10AT1- CRYβB2 cells with anti-ppRb (red), anti-CRYβB2-flag (green) (**C)**, anti- CRYβB2-flag (red), anti-p53 (green) (**D**) and Hoechst (blue). The merge of the fluorescent channels is shown (right). * p < 0.05, ** p< 0.01 and *** p< 0.001.


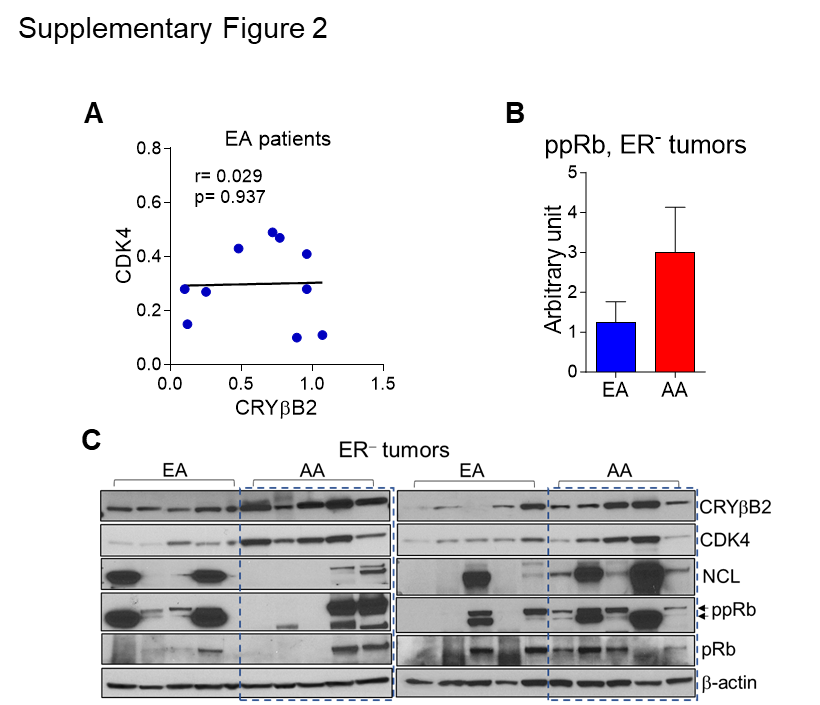


**Supplementary Fig. 2. CRYβB2 activates CDK4/ pRb pathway in ER- and ER+ breast tumors** **of AA and EA women**. **A**.Correlation of CRYβB2 and CDK4 proteins in ER- tumors from EA women (n=10 each). **B**. Image J quantification of ppRb protein in ER- tumors of AA and EA women. **C**. Western blot analysis of CRYβB2 and proteins involved in cell cycle progression in ER- tumors of AA and EA women. Arrows indicate hyper- (upper band) and hypo- (lower band) phosphorylated forms of pRb. * p < 0.05, ** p< 0.01 and *** p< 0.001.


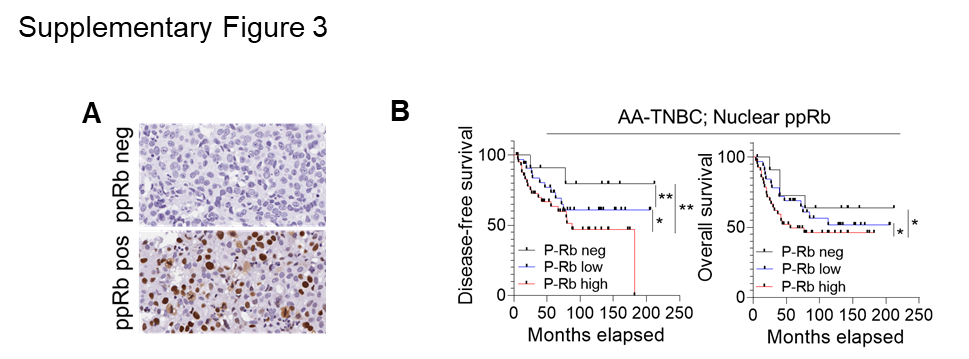


**Supplementary Fig. 3. CRYβB2 and ppRb associate with poor TNBC outcome in AA women**. **A**.Representative images of phosphorylated pRb (ppRb) IHC showing ppRb negative and positive tumors using TNBC from AA women (n=102). **B**. Kaplan Meier curves for disease-free and overall survival among AA- TNBC patients(n=86) according to ppRb negative, low and high expression.
